# Supplementary material for: Single-Dose Rifampicin Leprosy Chemoprophylaxis for Household Contacts in Kiribati: An Audit of a Combined Retrospective and Prospective Approach
Source: Preprints.org preprint supplement (doi:10.20944/preprints202401.0651.v1), 2024-01-08
Supplement: Supplementary file 1 [file supplementary]

**Supplementary data**

Table S1: Single dose rifampicin (SDR) chemoprophylaxis dosing

| **Age/Body weight** | **Rifampicin single dose** |
| --- | --- |
| - >15 years old - 10-14 years - Children 6-9 years (weight ≥ 20 kg) - Children 6-9 years (weight < 20 kg) - Children < 5 years | 600 mg  450 mg  300 mg  150 mg  10-15 mg/kg |
